# Supplementary material for: Identification of miRNAs and their targets from Brassica napus by high-throughput sequencing and degradome analysis
Source: PubMed Central journal article supplement (PMC3599582; doi:10.1186/1471-2164-13-421), 2012-08-24

**Figure S2.** Secondary structures of 62 putative novel *B.napus* miRNAs and miRNAs\*.

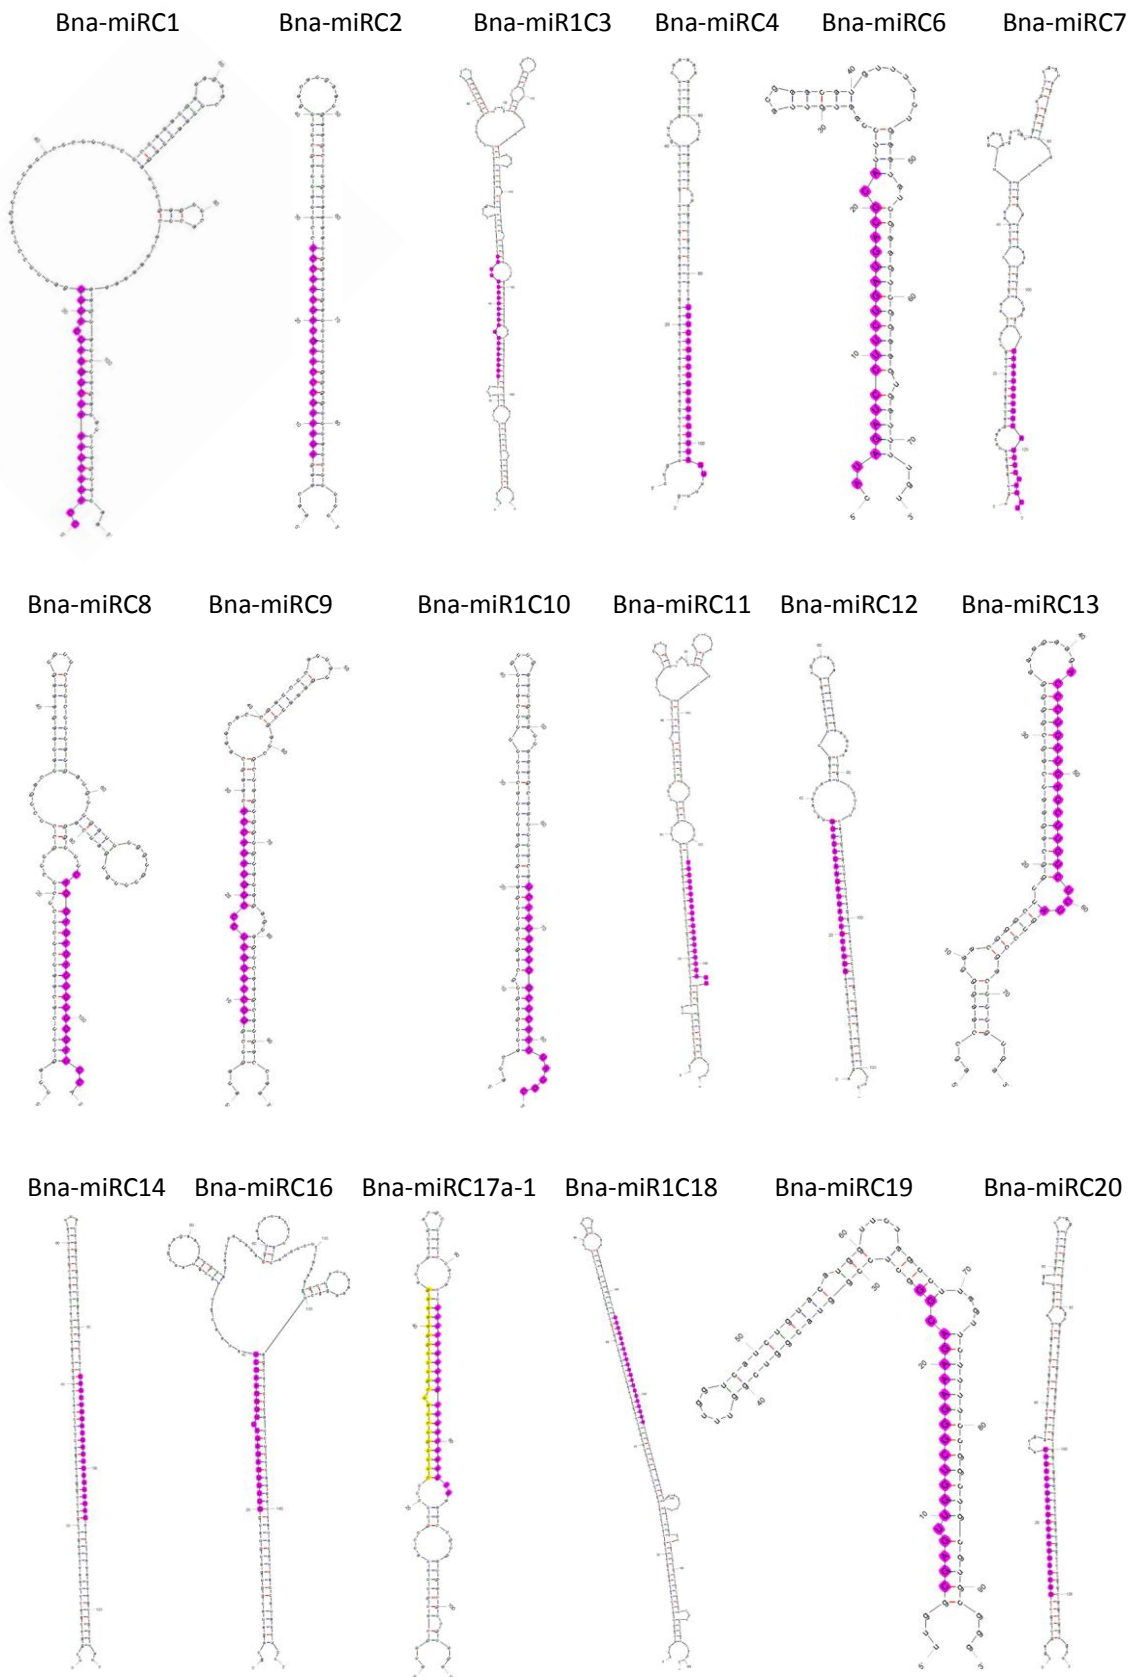

Bna-miRC21  
Bna-miRC28

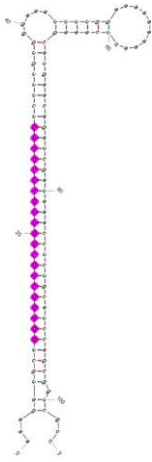

Bna-miRC24

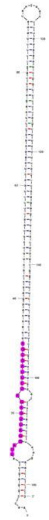

Bna-miRC25/25\*

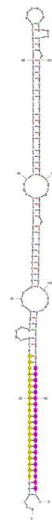

Bna-miR1C26

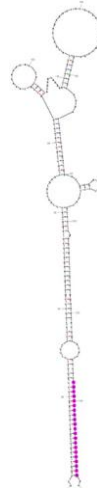

Bna-miRC27

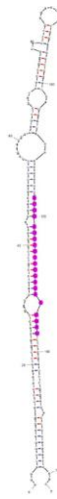

Bna-miRC29

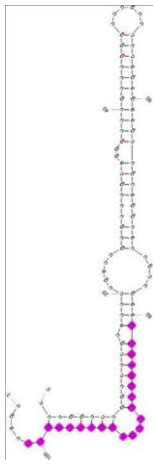

Bna-miRC30

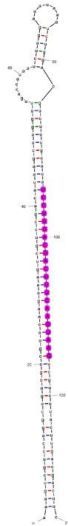

Bna-miRC31

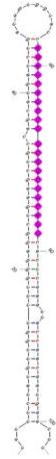

Bna-miR1C32

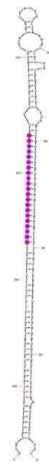

Bna-miRC33

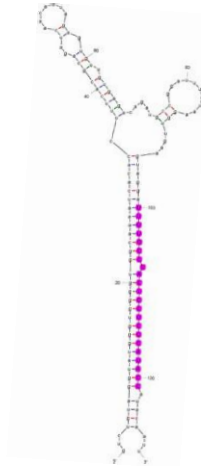

Bna-miRC34

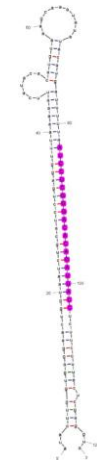

Bna-miRC35

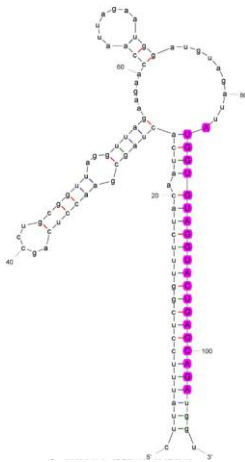

Bna-miRC36

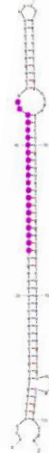

Bna-miRC37

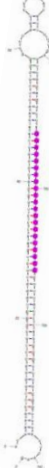

Bna-miRC38

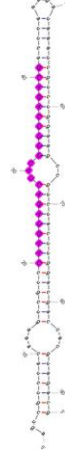

Bna-miR1C39

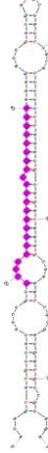

Bna-miRC40

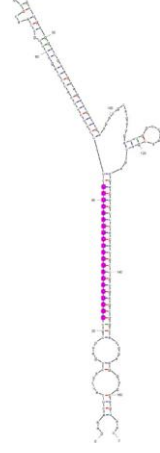

Bna-miRC41 Bna-miRC42 Bna-miRC43 Bna-miR1C44 Bna-miRC45 Bna-miRC46 Bna-miRC47

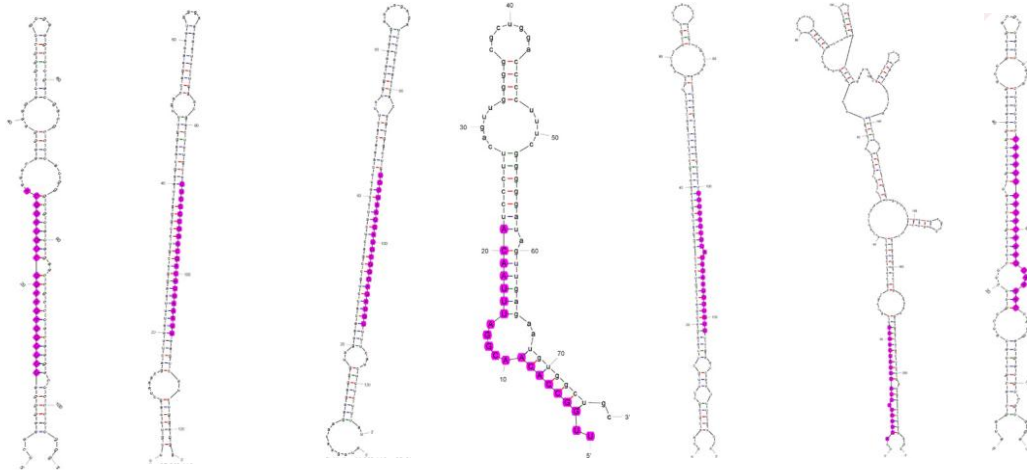

Pink represents miRNA; yellow represents miRNA\*

Bna-miRC5 family

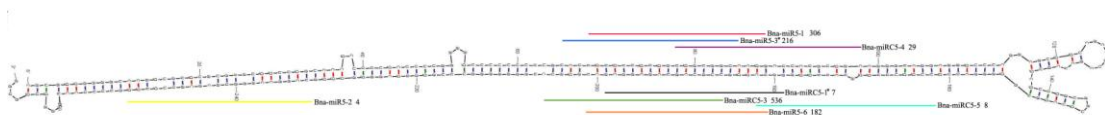

Bna-miRC15 family

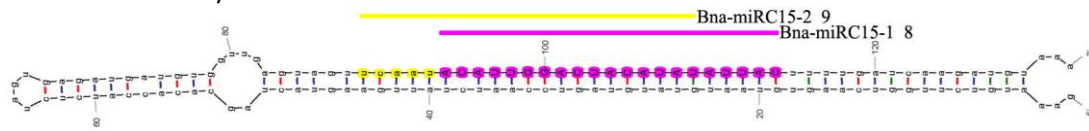

Bna-miRC22a family

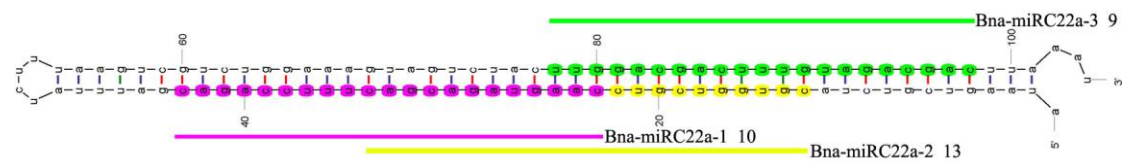

Bna-miRC23a family

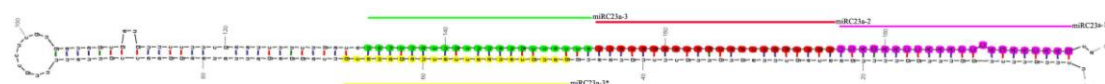

Supplement: 1471-2164-13-421-S5.pdf [file 1471-2164-13-421-S5.pdf]
