# Supplementary material for: Identification of miRNAs and their targets from Brassica napus by high-throughput sequencing and degradome analysis
Source: PubMed Central journal article supplement (PMC3599582; doi:10.1186/1471-2164-13-421), 2012-08-24
Supplement: 1471-2164-13-421-S1.pdf [file 1471-2164-13-421-S1.pdf]

**Figure S1.** Secondary structures of 41 conserved *B.napus* miRNAs and miRNAs\*.

Bna-miR159\* Bna-miR159b Bna-miR160a/a\* Bna-miR161\* Bna-miR162b/b\* Bna-miR165a

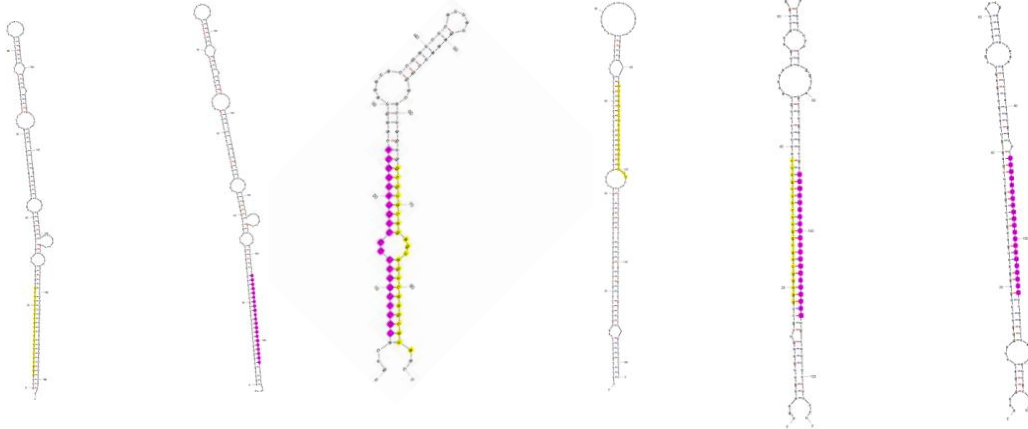

Bna-miR166a\* Bna-miR166e Bna-miR166f Bna-miR167d Bna-miR167e/e\* Bna-miR167f

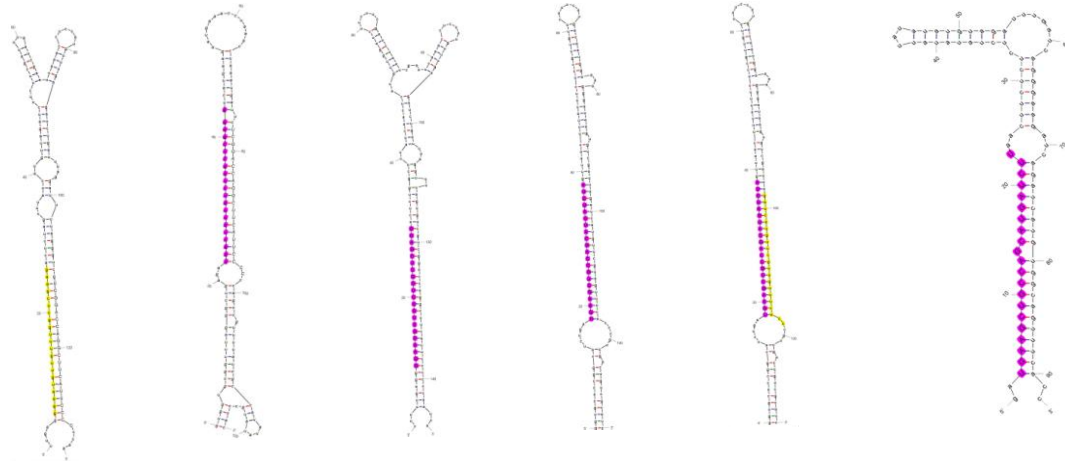

Bna-miR168b Bna-miR169n/n\* Bna-miR171a\* Bna-miR171f\* Bna-miR162a Bna-miR172a/a\*

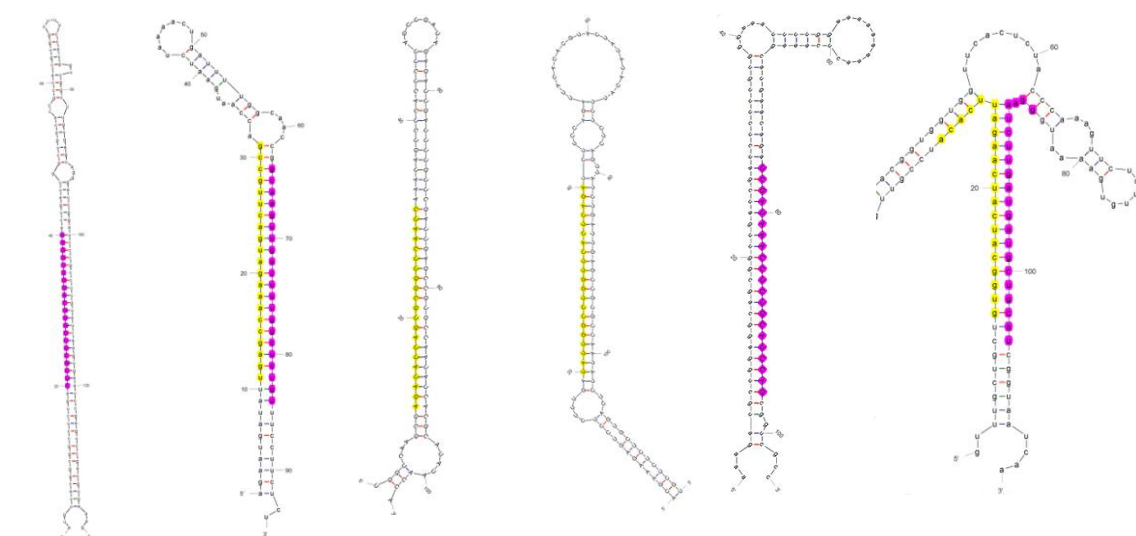

Bna-miR172b Bna-miR319a Bna-miR390d/d\* Bna-miR393\* Bna-miR396 Bna-miR398

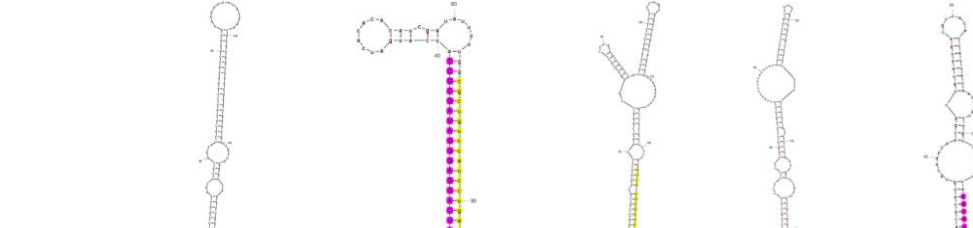

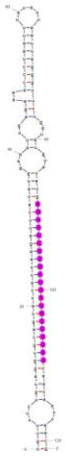

Bna-miR399d

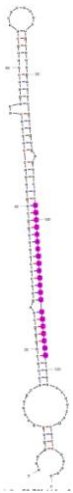

Bna-miR399f

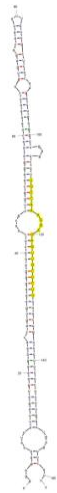

Bna-miR400

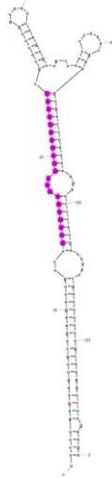

Bna-miR408a/a\*

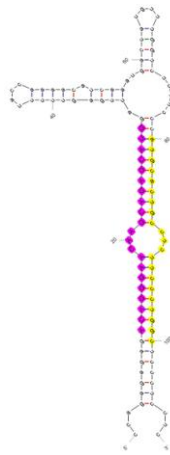

Bna-miR2111c

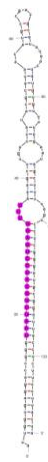

Bna-miR1140b/b\*

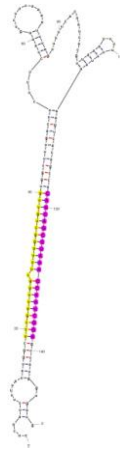

Bna-miR319b-1/b-2

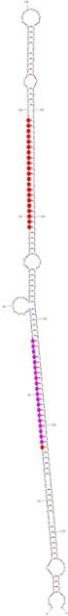

Bna-miR824\*

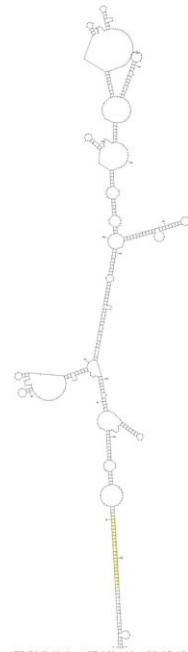

Pink and red represents miRNA; yellow represents miRNA\*
