# Supplementary material for: Identification of miRNAs and their targets from Brassica napus by high-throughput sequencing and degradome analysis
Source: PubMed Central journal article supplement (PMC3599582; doi:10.1186/1471-2164-13-421), 2012-08-24
Supplement: 1471-2164-13-421-S2.pdf [file 1471-2164-13-421-S2.pdf]

**Table S2** Known miRNAs in *B. napus*

| miRNA family  | reads in <i>B. napus</i> | References          |
|---------------|--------------------------|---------------------|
| Bna-miR156b   | 63                       | Wang et al., 2007   |
| Bna-miR159    | 16445                    | Wang et al., 2007   |
| Bna-miR161    | 34                       | Wang et al., 2007   |
| Bna-miR164    | 945                      | Wang et al., 2007   |
| Bna-miR166a   | 6570                     | Wang et al., 2007   |
| Bna-miR168    | 208                      | Wang et al., 2007   |
| Bna-miR169a   | 8                        | Wang et al., 2007   |
| Bna-miR169c   | 4                        | Wang et al., 2007   |
| Bna-miR171a   | 30                       | Wang et al., 2007   |
| Bna-miR171f   | 291                      | Wang et al., 2007   |
| Bna -miR393   | 48                       | Xie et al., 2007    |
| Bna-miR397a   | 19                       | Wang et al., 2007   |
| Bna-miR824    | 41                       | Kutter et al., 2007 |
| Bna-miR2111b* | 25                       | Pant et al., 2009   |
