# Supplementary material for: Identification of miRNAs and their targets from Brassica napus by high-throughput sequencing and degradome analysis
Source: PubMed Central journal article supplement (PMC3599582; doi:10.1186/1471-2164-13-421), 2012-08-24
Supplement: 1471-2164-13-421-S3.pdf [file 1471-2164-13-421-S3.pdf]

**Table S3 Four conserved miRNAs in *B. napus*.**

| miRNA          | miR sequence (5' → 3') | miR length<br>(nt) | Copy | genome   | strand | Genomic position |         | Genomic position   |                  |
|----------------|------------------------|--------------------|------|----------|--------|------------------|---------|--------------------|------------------|
|                |                        |                    |      |          |        | miR start        | miR end | precursor<br>start | precursor<br>end |
| Bna--miR166f   | GGACTGTTGTCTGGCTCGAGG  | 21                 | 50   | AC189313 | -      | 128843           | 128863  | 128758             | 128885           |
| Bna-miR824*    | CCTTCTCATCGATGGTCTAGA  | 21                 | 14   | AC189548 | +      | 19239            | 19259   | 18652              | 19283            |
| Bna -miR1140b  | CAACAGCCTAAACCAATCGGA  | 21                 | 25   | AC189528 | -      | 2998             | 3018    | 2986               | 3135             |
| Bna -miR1140b* | TCCGATTGGCTTTAGGCTGTTG | 22                 | 13   | AC189528 | -      | 3096             | 3117    | 2986               | 3135             |
