# Supplementary material for: Identification of miRNAs and their targets from Brassica napus by high-throughput sequencing and degradome analysis
Source: PubMed Central journal article supplement (PMC3599582; doi:10.1186/1471-2164-13-421), 2012-08-24
Supplement: 1471-2164-13-421-S4.pdf [file 1471-2164-13-421-S4.pdf]

Table S1 miRNA and primer sequences.

|               |                                               |                                                                                                   |
|---------------|-----------------------------------------------|---------------------------------------------------------------------------------------------------|
| Bna-miR159    | miRNA sequence<br>RT primer<br>Forward primer | TTTGGATTGAAGGGAGCTCTA<br>gtcgtatccagtgcagggtccgaggtattcgactggatacgcTAGAGC<br>CGGCGTTTGGATTGAAGGG  |
| Bna--miR159b  | miRNA sequence<br>RT primer<br>Forward primer | TTTGGATTGAAGGGAGCTCTT<br>gtcgtatccagtgcagggtccgaggtattcgactggatacgcAAGAGC<br>GCGCGCTTTGGATTGAAGGG |
| Bna-miR160a   | miRNA sequence<br>RT primer<br>Forward primer | TGCCTGGCTCCCTGTATGCCA<br>gtcgtatccagtgcagggtccgaggtattcgactggatacgcTGGCAT<br>AGATCATGCCTGGCTCCCTG |
| Bna-miR162a   | miRNA sequence<br>RT primer<br>Forward primer | TCGATAAACCTCTGCATCCAG<br>gtcgtatccagtgcagggtccgaggtattcgactggatacgcCTGGAT<br>GCGCGCTCGATAAACCTCTG |
| Bna-miR165a   | miRNA sequence<br>RT primer<br>Forward primer | TCGGACCAGGCTTCATCCCCC<br>gtcgtatccagtgcagggtccgaggtattcgactggatacgcGGGGGA<br>ACTGCATCGGACCAGGCTTC |
| Bna-miR166e   | miRNA sequence<br>RT primer<br>Forward primer | GGAATGTTGTCTGGCTCGAGG<br>gtcgtatccagtgcagggtccgaggtattcgactggatacgcCCTCGA<br>GCGCTCGGAATGTTGTCTGG |
| Bna-miR167f   | miRNA sequence<br>RT primer<br>Forward primer | TGAAGCTGCCAGCATGATCTT<br>gtcgtatccagtgcagggtccgaggtattcgactggatacgcTAGATC<br>ATGCGCATGAAGCTGCCAGC |
| Bna-miR169a   | miRNA sequence<br>RT primer<br>Forward primer | CAGCCAAGGATGACTTGCCGA<br>gtcgtatccagtgcagggtccgaggtattcgactggatacgcTCGGCA<br>CGAGTCCAGCCAAGGATGAC |
| Bna-miR171a*  | miRNA sequence<br>RT primer<br>Forward primer | TTGAGCCGTGCCAATATCACT<br>gtcgtatccagtgcagggtccgaggtattcgactggatacgcAGTGAT<br>GTTAACTTGAGCCGTGCC   |
| Bna -miR390d  | miRNA sequence<br>RT primer<br>Forward primer | AAGCTCAGGAGGGATAGCGCC<br>gtcgtatccagtgcagggtccgaggtattcgactggatacgcGGCGCT<br>GTCTCGTAAGCTCAGGAGGG |
| Bna-miR400    | miRNA sequence<br>RT primer<br>Forward primer | TATGAGAGTATTATAAGTCAC<br>gtcgtatccagtgcagggtccgaggtattcgactggatacgcGTGACT<br>GCGCGGTATGAGAGTATT   |
| Bna -miR1140b | miRNA sequence<br>RT primer<br>Forward primer | CAACAGCCTAAACCAATCGGA<br>gtcgtatccagtgcagggtccgaggtattcgactggatacgcTCCGAT<br>GACCCAACAGCCTAAACC   |
| Bna-miRC2     | miRNA sequence<br>RT primer<br>Forward primer | ATAAATCCCAAGCATCATCCA<br>gtcgtatccagtgcagggtccgaggtattcgactggatacgcTGGATG<br>GCGCCATAAATCCCAAGC   |
| Bna-miRC5-1   | miRNA sequence<br>RT primer<br>Forward primer | TGTGTTGTGATGATAATCCGA<br>gtcgtatccagtgcagggtccgaggtattcgactggatacgcTCGGAT<br>GCGCCGTGTGTTGTGATGAT |

|               |                                               |                                                                                                   |
|---------------|-----------------------------------------------|---------------------------------------------------------------------------------------------------|
| Bna-miRC5-6   | miRNA sequence<br>RT primer<br>Forward primer | TCGGATTATCATCACAACACT<br>gtcgtatccagtgcagggtccgaggtattcgactggatacgcAGTGTT<br>GCGCGTCGGATTATCATCAC |
| Bna-miRC9     | miRNA sequence<br>RT primer<br>Forward primer | TGCCTGGCTCCCTGTATACCA<br>gtcgtatccagtgcagggtccgaggtattcgactggatacgcTGGTAT<br>TAATTGCCTGGCTCCCTG   |
| Bna-miRC17a-1 | miRNA sequence<br>RT primer<br>Forward primer | TTTCCAAATGTAGACAAAGCA<br>gtcgtatccagtgcagggtccgaggtattcgactggatacgcTGCTTT<br>GCGCGTTTCCAAATGTAG   |
| Bna-miRC18    | miRNA sequence<br>RT primer<br>Forward primer | TCGCGATCTTAGATCCTCTAA<br>gtcgtatccagtgcagggtccgaggtattcgactggatacgcTTAGAG<br>GCCTCGCATCTTAGATC    |
| Bna-miRC21    | miRNA sequence<br>RT primer<br>Forward primer | GGAGGCAGCGGTTGATCGATC<br>gtcgtatccagtgcagggtccgaggtattcgactggatacgcGATCGA<br>TATAGGAGGCAGCGGTTG   |
| Bna-miRC22a-1 | miRNA sequence<br>RT primer<br>Forward primer | CAAGTAGACGACTTTCCAGAC<br>gtcgtatccagtgcagggtccgaggtattcgactggatacgcGTCTGG<br>GCGCCAAGTAGACGACTT   |
| Bna-miRC30    | miRNA sequence<br>RT primer<br>Forward primer | TCCTGGACGACTTTCAAGTAAG<br>gtcgtatccagtgcagggtccgaggtattcgactggatacgcCTTACT<br>GCATCCTGGACGACTTTC  |
| Bna-miRC45    | miRNA sequence<br>RT primer<br>Forward primer | TTTCATCTTAGAGAATGTTGTC<br>gtcgtatccagtgcagggtccgaggtattcgactggatacgcGACAAC<br>GCGCGGTTTCATCTTAGAG |
| Universal RV  | Reverse primer                                | GTGCAGGGTCCGAGGTATTC                                                                              |
