# Supplementary material for: Identification of miRNAs and their targets from Brassica napus by high-throughput sequencing and degradome analysis
Source: PubMed Central journal article supplement (PMC3599582; doi:10.1186/1471-2164-13-421), 2012-08-24
Supplement: 1471-2164-13-421-S8.pdf [file 1471-2164-13-421-S8.pdf]

Table S4 5'RACE primer sequences

| miRNAs        | Target EST                                    | GSPO                   | GSPI                   |
|---------------|-----------------------------------------------|------------------------|------------------------|
| Bna-miR160a   | EV006535                                      | TAGTGGTGGTTGCTGTTAGGCG | TGTTAGGCGACAGCTCATCC   |
| Bna-miR156a   | EL625881                                      | CCTTCAAGCATTACTTGGG    | GCAGATAGCTAGAGATTAC    |
| Bna-miRC2     | EV142354                                      | ATCTGCAGAGAAGCCACACC   | GTCCAATCCACCATCCACTAAC |
| Bna-miRC18    | GT074945                                      | CCTGACCAGTCTTGAACCTCAG | GAACCTCAGCCAAGTACCTGTG |
| Bna-miRC22a-1 | EV044066                                      | CTCCGTTCCAGAAATGTCTTG  | CGCGGCGTCTTGAAAATTAAC  |
| RACE 5'primer | AATGATACGGCGACCACCGACAGGTTCTAGAGTTCTACAGTCCGA |                        |                        |
